# Supplementary material
Source: PubMed Central journal article supplement (PMC7135652)
Supplement: NIHMS1551797-supplement-Supplemental_Material.pdf [file NIHMS1551797-supplement-Supplemental_Material.pdf]

## SUPPLEMENTAL MATERIAL

**Supplemental Table 1.** Comparison between the participants from Chicago field center and those included in this study

|                                    | Total attended<br>Y30<br>(n=745) | Included in this study |                | <i>p-value</i> |
|------------------------------------|----------------------------------|------------------------|----------------|----------------|
|                                    |                                  | No<br>(n=554)          | Yes<br>(n=191) |                |
| <b>Demographics at Y30</b>         |                                  |                        |                |                |
| Age, y                             | 55 ± 4                           | 55 ± 4                 | 54 ± 4         | 0.025          |
| Female, %                          | 57                               | 61                     | 46             | <0.001         |
| Blacks, %                          | 46                               | 47                     | 44             | 0.454          |
| Education, y                       | 15 ± 3                           | 16 ± 3                 | 15 ± 3         | 0.130          |
| Height, cm                         | 170 ± 10                         | 169 ± 9                | 171 ± 10       | 0.007          |
| <b>Risk Factors at Y30</b>         |                                  |                        |                |                |
| Body Mass Index, kg/m <sup>2</sup> | 30 ± 7                           | 30 ± 7                 | 30 ± 6         | 0.999          |
| Current Smoker, %                  | 15                               | 15                     | 14             | 0.892          |
| Total cholesterol, mg/dL           | 190 ± 38                         | 189 ± 37               | 192 ± 38       | 0.299          |
| Prevalence of diabetes, %          | 16                               | 16                     | 15             | 0.717          |
| SBP, mmHG                          | 120 ± 17                         | 120 ± 17               | 120 ± 15       | 0.884          |
| DBP, mmHG                          | 73 ± 11                          | 73 ± 11                | 74 ± 11        | 0.524          |

Data are expressed as mean±SD or %. Characteristics were compared using t-test for continuous variables and chi-squared test for categorical variables. Chicago cohort had a total of 1108 participants at baseline. A total of 745 participants attended the Y30 follow-up examination (n=64 death before Y30 examination). Abbreviations: SBP: systolic blood pressure; DBP: diastolic blood pressure.

**Supplemental Table 2.** Cumulative systolic and diastolic blood pressure in relation to gait and cognition in midlife after adjusting for time-dependent risk factors

| <b>Gait</b>                      | <b>Cumulative SBP</b><br>per 1 SD higher<br>$\beta$ (95% CI) | <i>p</i> -value | <b>Cumulative DBP</b><br>per 1 SD higher<br>$\beta$ (95% CI) | <i>p</i> -value |
|----------------------------------|--------------------------------------------------------------|-----------------|--------------------------------------------------------------|-----------------|
| <i>Step velocity, cm/sec</i>     |                                                              |                 |                                                              |                 |
| Model 2                          | -3.76 (-7.03, -0.50)                                         | 0.024           | -3.36 (-6.35, -0.38)                                         | 0.028           |
| <i>Step length, cm</i>           |                                                              |                 |                                                              |                 |
| Model 2                          | -1.20 (-2.29, -0.10)                                         | 0.033           | -1.22 (-2.22, -0.22)                                         | 0.017           |
| <i>Step time, sec</i>            |                                                              |                 |                                                              |                 |
| Model 2                          | 0.008 (-0.001, 0.02)                                         | 0.075           | 0.007 (-0.001, 0.02)                                         | 0.088           |
| <i>Stride width, cm</i>          |                                                              |                 |                                                              |                 |
| Model 2                          | -0.31 (-0.94, 0.33)                                          | 0.345           | -0.44 (-1.02, 0.14)                                          | 0.138           |
| <i>Gait variability index</i>    |                                                              |                 |                                                              |                 |
| Model 2                          | 1.41 (-0.21, 3.02)                                           | 0.087           | 2.05 (0.59, 3.50)                                            | 0.006           |
| <i>Step length asymmetry, cm</i> |                                                              |                 |                                                              |                 |
| Model 2                          | -0.47 (-1.32, 0.39)                                          | 0.283           | -0.33 (-1.11, 0.46)                                          | 0.411           |
| <b>Cognition</b>                 | <b>Cumulative SBP</b><br>per SD increase<br>$\beta$ (95% CI) | <i>p</i> -value | <b>Cumulative DBP</b><br>per SD increase<br>$\beta$ (95% CI) | <i>p</i> -value |
| <i>Memory domain</i>             |                                                              |                 |                                                              |                 |
| Model 2                          | -0.15 (-0.29, -0.02)                                         | 0.024           | -0.16 (-0.28, -0.04)                                         | 0.012           |
| <i>Executive domain</i>          |                                                              |                 |                                                              |                 |
| Model 2                          | -0.11 (-0.21, -0.002)                                        | 0.046           | -0.04 (-0.14, 0.06)                                          | 0.428           |
| <i>Attention domain</i>          |                                                              |                 |                                                              |                 |
| Model 2                          | -0.02 (-0.15, 0.10)                                          | 0.709           | -0.02 (-0.13, 0.10)                                          | 0.785           |
| <i>Global domain</i>             |                                                              |                 |                                                              |                 |
| Model 2                          | -0.11 (-0.20, -0.02)                                         | 0.018           | -0.08 (-0.17, 0.009)                                         | 0.080           |

$\beta$  represents unstandardized regression coefficients.

Model 2: Adjusted for age, sex, race, height, cumulative body mass index, lifetime pack years of cigarette smoking, cumulative fasting glucose, cumulative cholesterol, physical activity (for gait analyses) and depression (for cognition analyses).

Abbreviations: SBP: systolic blood pressure and DBP: diastolic blood pressure.

**Supplemental Table 3.** Association of cumulative blood pressure with cerebral white matter hyper-intensity in the MRI sub-cohort (n=144)

|                   | <b>Cumulative SBP</b><br>per 1 SD higher<br>$\beta$ (95% CI) | <i>p</i> -value | <b>Cumulative DBP</b><br>per 1 SD higher<br>$\beta$ (95% CI) | <i>p</i> -value |
|-------------------|--------------------------------------------------------------|-----------------|--------------------------------------------------------------|-----------------|
| <b>WMH, %ICV*</b> |                                                              |                 |                                                              |                 |
| Model 1           | 0.40 (0.16, 0.64)                                            | 0.001           | 0.33 (0.09, 0.56)                                            | 0.007           |
| Model 2           | 0.31 (0.06, 0.56)                                            | 0.014           | 0.25 (0.006, 0.50)                                           | 0.045           |

$\beta$  represents unstandardized regression coefficients.

\*WMH values were log-transformed because they were not normally distributed.

Model 1 is adjusted for age, sex and race. Model 2 is adjusted for age, sex, race, body mass index, smoking status, prevalence of diabetes and total cholesterol.

**Supplemental Table 4.** Cumulative exposure to blood pressure in relation to gait and cognition after adjustment for WMH (n=144)

| <b>Gait</b>                       | <b>Cumulative SBP</b>               |                 | <b>Cumulative DBP</b>               |                 |
|-----------------------------------|-------------------------------------|-----------------|-------------------------------------|-----------------|
|                                   | per 1SD higher<br>$\beta$ (95% CI)  | <i>p</i> -value | per 1SD higher<br>$\beta$ (95% CI)  | <i>p</i> -value |
| <b>Step velocity, cm/sec</b>      |                                     |                 |                                     |                 |
| Model 2                           | -4.55 (-8.40, -0.70)                | 0.021           | -3.77 (-7.57, 0.04)                 | 0.053           |
| Model 2 + WMH                     | -4.77 (-8.70, -0.83)                | 0.018           | -3.90 (-7.76, -0.03)                | 0.048           |
| <b>Step Length, cm</b>            |                                     |                 |                                     |                 |
| Model 2                           | -1.73 (-3.03, -0.42)                | 0.010           | -1.38 (-2.67, -0.09)                | 0.036           |
| Model 2 + WMH                     | -1.87 (-3.19, -0.54)                | 0.006           | -1.48 (-2.79, -0.17)                | 0.027           |
| <b>Step time, sec</b>             |                                     |                 |                                     |                 |
| Model 2                           | 0.007 (-0.004, 0.018)               | 0.220           | 0.007 (-0.003, 0.018)               | 0.181           |
| Model 2 + WMH                     | 0.006 (-0.005, 0.017)               | 0.265           | 0.007 (-0.004, 0.018)               | 0.213           |
| <b>Stride width, cm</b>           |                                     |                 |                                     |                 |
| Model 2                           | -0.39 (-1.06, 0.28)                 | 0.252           | -0.57 (-1.22, 0.08)                 | 0.087           |
| Model 2 + WMH                     | -0.38 (-1.07, 0.30)                 | 0.272           | -0.57 (-1.23, 0.10)                 | 0.094           |
| <b>Gait variability index</b>     |                                     |                 |                                     |                 |
| Model 2                           | 1.59 (-0.14, 3.31)                  | 0.071           | 1.97 (0.29, 3.64)                   | 0.022           |
| Model 2 + WMH                     | 1.43 (-0.33, 3.18)                  | 0.110           | 1.84 (0.14, 3.54)                   | 0.034           |
| <b>Step length asymmetry, sec</b> |                                     |                 |                                     |                 |
| Model 2                           | -0.71 (-1.67, 0.25)                 | 0.145           | -0.48 (-1.44, 0.47)                 | 0.318           |
| Model 2 + WMH                     | -0.81 (-1.78, 0.17)                 | 0.104           | -0.55 (-1.51, 0.42)                 | 0.264           |
| <b>Cognition</b>                  | <b>Cumulative SBP</b>               |                 | <b>Cumulative DBP</b>               |                 |
|                                   | per SD increase<br>$\beta$ (95% CI) | <i>p</i> -value | per SD increase<br>$\beta$ (95% CI) | <i>p</i> -value |
| <b>Memory domain</b>              |                                     |                 |                                     |                 |
| Model 2                           | -0.23 (-0.39, -0.08)                | 0.003           | -0.24 (-0.39, -0.09)                | 0.002           |
| Model 2 + WMH                     | -0.21 (-0.37, -0.06)                | 0.007           | -0.23 (-0.38, -0.08)                | 0.003           |
| <b>Executive domain</b>           |                                     |                 |                                     |                 |
| Model 2                           | -0.14 (-0.26, -0.02)                | 0.024           | -0.09 (-0.21, 0.03)                 | 0.121           |
| Model 2 + WMH                     | -0.13 (-0.25, -0.006)               | 0.040           | -0.08 (-0.20, 0.04)                 | 0.169           |
| <b>Attention domain</b>           |                                     |                 |                                     |                 |
| Model 2                           | -0.10 (-0.24, 0.04)                 | 0.155           | -0.10 (-0.24, 0.04)                 | 0.142           |
| Model 2 + WMH                     | -0.09 (-0.23, 0.05)                 | 0.215           | -0.09 (-0.23, 0.05)                 | 0.187           |
| <b>Global domain</b>              |                                     |                 |                                     |                 |
| Model 2                           | -0.17 (-0.27, -0.07)                | 0.001           | -0.15 (-0.25, -0.05)                | 0.004           |
| Model 2 + WMH                     | -0.16 (-0.26, -0.05)                | 0.003           | -0.14 (-0.24, -0.04)                | 0.008           |

$\beta$  represents unstandardized regression coefficients.

Model 2: adjusted for age, sex, race, height or education, body mass index, smoking status, prevalence of diabetes and total cholesterol.

**Supplemental Table 5.** Cumulative blood pressure in relation to gait and cognition stratified for antihypertensive medication use

| <b>Gait</b>                       | <b>Cumulative SBP<br/>per SD increase<br/><math>\beta</math> (95% CI)</b> | <b><i>p</i> for<br/>interaction</b> | <b>Cumulative DBP<br/>per SD increase<br/><math>\beta</math> (95% CI)</b> | <b><i>P</i> for<br/>interaction</b> |
|-----------------------------------|---------------------------------------------------------------------------|-------------------------------------|---------------------------------------------------------------------------|-------------------------------------|
| <b>Step velocity, cm/sec</b>      |                                                                           |                                     |                                                                           |                                     |
| BPmed no n=130                    | -4.43 (-8.98, 0.11)                                                       | 0.355                               | -4.18 (-8.68, 0.32)                                                       | 0.518                               |
| BPmed yes n=61                    | -3.02 (-8.89, 2.85)                                                       |                                     | -2.61 (-7.54, 2.31)                                                       |                                     |
| <b>Step length, cm</b>            |                                                                           |                                     |                                                                           |                                     |
| BPmed no n=130                    | -1.51 (-2.99, -0.03)                                                      | 0.122                               | -1.71 (-3.17, -0.26)                                                      | 0.139                               |
| BPmed yes n=61                    | -0.28 (-2.28, 1.73)                                                       |                                     | -0.27 (-1.95, 1.41)                                                       |                                     |
| <b>Step time, sec</b>             |                                                                           |                                     |                                                                           |                                     |
| BPmed no n=130                    | 0.008 (-0.004, 0.020)                                                     | 0.755                               | 0.006 (-0.006, 0.018)                                                     | 0.471                               |
| BPmed yes n=61                    | 0.014 (-0.005, 0.032)                                                     |                                     | 0.013 (-0.003, 0.028)                                                     |                                     |
| <b>Stride width, cm</b>           |                                                                           |                                     |                                                                           |                                     |
| BPmed no n=130                    | -0.29 (-1.09, 0.50)                                                       | 0.848                               | -0.49 (-1.27, 0.29)                                                       | 0.742                               |
| BPmed yes n=61                    | -0.57 (-1.80, 0.66)                                                       |                                     | -0.55 (-1.58, 0.48)                                                       |                                     |
| <b>Gait variability index</b>     |                                                                           |                                     |                                                                           |                                     |
| BPmed no n=130                    | 1.54 (-0.72, 3.80)                                                        | 0.798                               | 2.31 (0.10, 4.53)                                                         | 0.950                               |
| BPmed yes n=61                    | 1.81 (-0.91, 4.54)                                                        |                                     | 2.51 (0.29, 4.73)                                                         |                                     |
| <b>Step length asymmetry, sec</b> |                                                                           |                                     |                                                                           |                                     |
| BPmed no n=130                    | -0.11 (-1.11, 0.88)                                                       | 0.895                               | 0.30 (-0.68, 1.28)                                                        | 0.758                               |
| BPmed yes n=61                    | -0.58 (-2.49, 1.34)                                                       |                                     | -0.56 (-2.17, 1.06)                                                       |                                     |
| <b>Cognition</b>                  | <b>Cumulative SBP<br/>per SD increase<br/><math>\beta</math> (95% CI)</b> | <b><i>P</i> for<br/>interaction</b> | <b>Cumulative DBP<br/>per SD increase<br/><math>\beta</math> (95% CI)</b> | <b><i>P</i> for<br/>interaction</b> |
| <b>Memory domain</b>              |                                                                           |                                     |                                                                           |                                     |
| BPmed no n=130                    | -0.18 (-0.36, 0.01)                                                       | 0.639                               | -0.16 (-0.34, 0.03)                                                       | 0.992                               |
| BPmed yes n=61                    | -0.14 (-0.37, 0.10)                                                       |                                     | -0.16 (-0.35, 0.03)                                                       |                                     |
| <b>Executive domain</b>           |                                                                           |                                     |                                                                           |                                     |
| BPmed no n=130                    | -0.13 (-0.26, 0.001)                                                      | 0.549                               | -0.09 (-0.22, 0.05)                                                       | 0.456                               |
| BPmed yes n=61                    | -0.05 (-0.24, 0.15)                                                       |                                     | 0.003 (-0.16, 0.17)                                                       |                                     |
| <b>Attention domain</b>           |                                                                           |                                     |                                                                           |                                     |
| BPmed no n=130                    | -0.08 (-0.24, 0.09)                                                       | 0.304                               | -0.03 (-0.19, 0.14)                                                       | 0.777                               |
| BPmed yes n=61                    | 0.06 (-0.17, 0.29)                                                        |                                     | -0.01 (-0.21, 0.18)                                                       |                                     |
| <b>Global domain</b>              |                                                                           |                                     |                                                                           |                                     |
| BPmed no n=130                    | -0.15 (-0.27, -0.03)                                                      | 0.255                               | -0.12 (-0.23, 0.004)                                                      | 0.421                               |
| BPmed yes n=61                    | -0.04 (-0.22, 0.15)                                                       |                                     | -0.04 (-0.19, 0.11)                                                       |                                     |

$\beta$  represents unstandardized regression coefficients.

Analyses were adjusted for age, sex, race, height or education, body mass index, smoking status, prevalence of diabetes and total cholesterol.

Abbreviations: SBP: systolic blood pressure; DBP: diastolic blood pressure and BPmed: antihypertensive medication use.

**Supplemental Table 6.** Cumulative blood pressure in relation to gait and cognition stratified by presence or absence of hypertension during follow-up

| <b>Gait</b>                       | <b>Cumulative SBP<br/>per SD increase<br/><math>\beta</math> (95% CI)</b> | <b><i>p</i> for<br/>interaction</b> | <b>Cumulative DBP<br/>per SD increase<br/><math>\beta</math> (95% CI)</b> | <b><i>p</i> for<br/>interaction</b> |
|-----------------------------------|---------------------------------------------------------------------------|-------------------------------------|---------------------------------------------------------------------------|-------------------------------------|
| <b>Step velocity, cm/sec</b>      |                                                                           |                                     |                                                                           |                                     |
| Normotensive                      | -4.19 (-9.40, 1.03)                                                       | 0.648                               | -3.18 (-8.19, 1.83)                                                       | 0.928                               |
| Hypertensive                      | -4.23 (-9.36, 0.79)                                                       |                                     | -3.79 (-8.08, 0.50)                                                       |                                     |
| <b>Step length, cm</b>            |                                                                           |                                     |                                                                           |                                     |
| Normotensive                      | -1.55 (-3.20, 0.11)                                                       | 0.264                               | -1.51 (-3.09, 0.07)                                                       | 0.365                               |
| Hypertensive                      | -0.66 (-2.50, 1.17)                                                       |                                     | -0.72 (-2.26, 0.82)                                                       |                                     |
| <b>Step time, sec</b>             |                                                                           |                                     |                                                                           |                                     |
| Normotensive                      | 0.007 (-0.007, 0.021)                                                     | 0.530                               | 0.004 (-0.009, 0.018)                                                     | 0.338                               |
| Hypertensive                      | 0.016 (0.0004, 0.031)                                                     |                                     | 0.014 (0.001, 0.027)                                                      |                                     |
| <b>Stride width, cm</b>           |                                                                           |                                     |                                                                           |                                     |
| Normotensive                      | -0.30 (-1.15, 0.56)                                                       | 0.705                               | -0.47 (-1.28, 0.35)                                                       | 0.728                               |
| Hypertensive                      | -0.30 (-1.47, 0.87)                                                       |                                     | -0.37 (-1.36, 0.62)                                                       |                                     |
| <b>Gait variability index</b>     |                                                                           |                                     |                                                                           |                                     |
| Normotensive                      | 2.91 (0.41, 5.41)                                                         | 0.614                               | 3.43 (1.08, 5.78)                                                         | 0.489                               |
| Hypertensive                      | 1.69 (-0.85, 4.22)                                                        |                                     | 2.62 (0.57, 4.68)                                                         |                                     |
| <b>Step length asymmetry, sec</b> |                                                                           |                                     |                                                                           |                                     |
| Normotensive                      | -0.50 (-1.62, 0.62)                                                       | 0.459                               | -0.22 (-1.29, 0.86)                                                       | 0.365                               |
| Hypertensive                      | -0.46 (-2.16, 1.25)                                                       |                                     | -0.29 (-1.76, 1.17)                                                       |                                     |
| <b>Cognition</b>                  | <b>Cumulative SBP<br/>per SD increase<br/><math>\beta</math> (95% CI)</b> | <b><i>P</i> for<br/>interaction</b> | <b>Cumulative DBP<br/>per SD increase<br/><math>\beta</math> (95% CI)</b> | <b><i>P</i> for<br/>interaction</b> |
| <b>Executive domain</b>           |                                                                           |                                     |                                                                           |                                     |
| Normotensive                      | -0.10 (-0.25, 0.04)                                                       | 0.556                               | -0.03 (-0.17, 0.11)                                                       | 0.736                               |
| Hypertensive                      | -0.02 (-0.20, 0.16)                                                       |                                     | -0.007 (-0.16, 0.14)                                                      |                                     |
| <b>Attention domain</b>           |                                                                           |                                     |                                                                           |                                     |
| Normotensive                      | -0.09 (-0.27, 0.08)                                                       | 0.125                               | -0.04 (-0.20, 0.13)                                                       | 0.591                               |
| Hypertensive                      | 0.11 (-0.11, 0.32)                                                        |                                     | -0.0002 (-0.19, 0.19)                                                     |                                     |
| <b>Memory domain</b>              |                                                                           |                                     |                                                                           |                                     |
| Normotensive                      | -0.18 (-0.39, 0.02)                                                       | 0.502                               | -0.14 (-0.34, 0.06)                                                       | 0.919                               |
| Hypertensive                      | -0.15 (-0.36, 0.06)                                                       |                                     | -0.20 (-0.37, -0.03)                                                      |                                     |
| <b>Global domain</b>              |                                                                           |                                     |                                                                           |                                     |
| Normotensive                      | -0.12 (-0.25, 0.008)                                                      | 0.280                               | -0.06 (-0.18, 0.07)                                                       | 0.826                               |
| Hypertensive                      | -0.03 (-0.19, 0.13)                                                       |                                     | -0.07 (-0.20, 0.07)                                                       |                                     |

$\beta$  represents unstandardized regression coefficients

Analyses were adjusted for age, sex, race, height or education, body mass index, smoking status, prevalence of diabetes and total cholesterol

Abbreviations: SBP: systolic blood pressure and DBP: diastolic blood pressure.
